# Supplementary material for: Natural variation of Dt2 determines branching in soybean
Source: PubMed Central journal article supplement (PMC9616897; doi:10.1038/s41467-022-34153-4), 2022-10-28
Supplement: 41467_2022_34153_MOESM3_ESM.pdf [file 41467_2022_34153_MOESM3_ESM.pdf]

## **Description of Additional Supplementary Files**

File Name: **Supplementary Data 1**

Description: Geographic information of soybean accessions in China.

File Name: **Supplementary Data 2**

Description: The primer sequences used in this study.
